# Supplementary material for: Fabrication and Characterization of Ni60A Alloy Coating on Copper Pipe by Plasma Cladding with Induction Heating
Source: MDPI journal article supplement (doi:10.3390/coatings11091080), 2021-09-06
Supplement: s1 [file s1]

Archive with 1 entries (1 files):
- coatings-1356380-supplementary.pdf
